# Supplementary material
Source: PubMed Central journal article supplement (PMC3769697)
Supplement: NIHMS501209-supplement-1_si_001.pdf [file NIHMS501209-supplement-1_si_001.pdf]

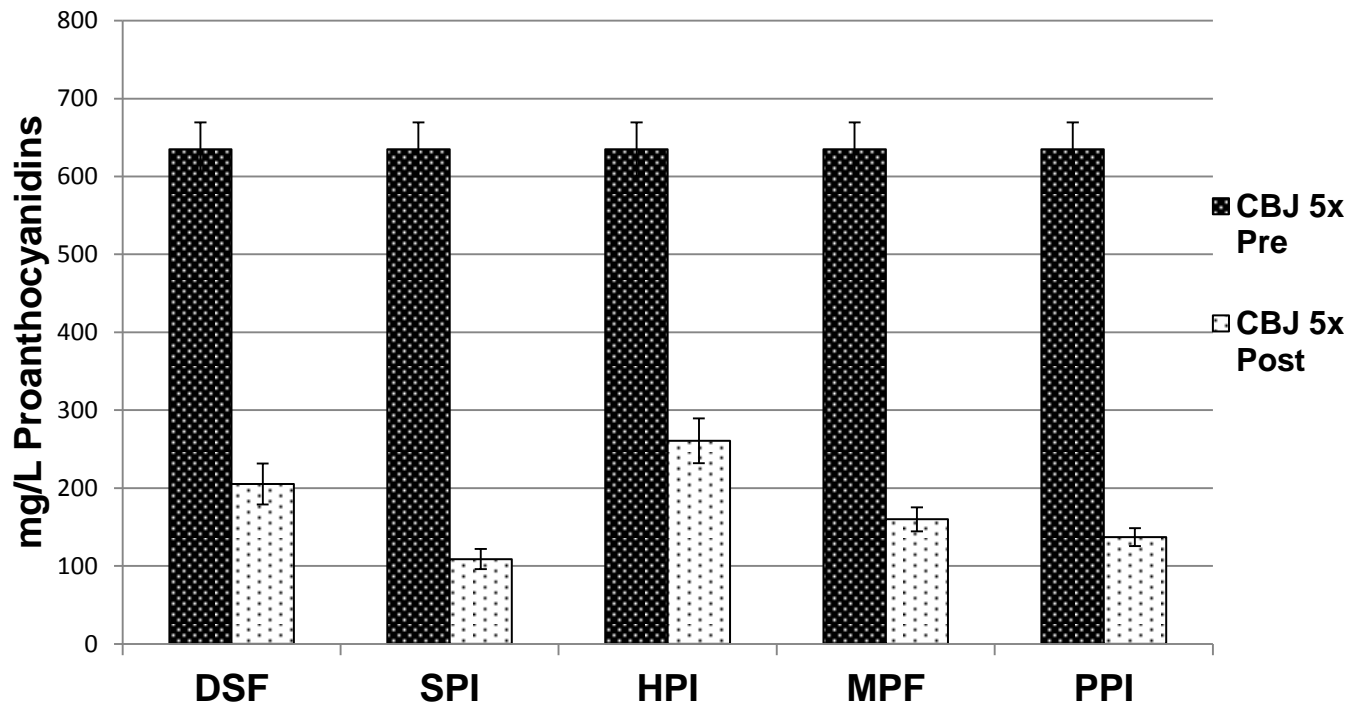

**Supplementary Figure 1:** Concentration of proanthocyanidins pre (before) and post (after) treatment with DSF (defatted soy flour), SPI (soy protein isolate), HPI (hemp protein isolate), MPN (medium roast peanut flour) and PPI (pea protein isolate), measured by DMAC assay and calculated as procyanidin A2 equivalent.

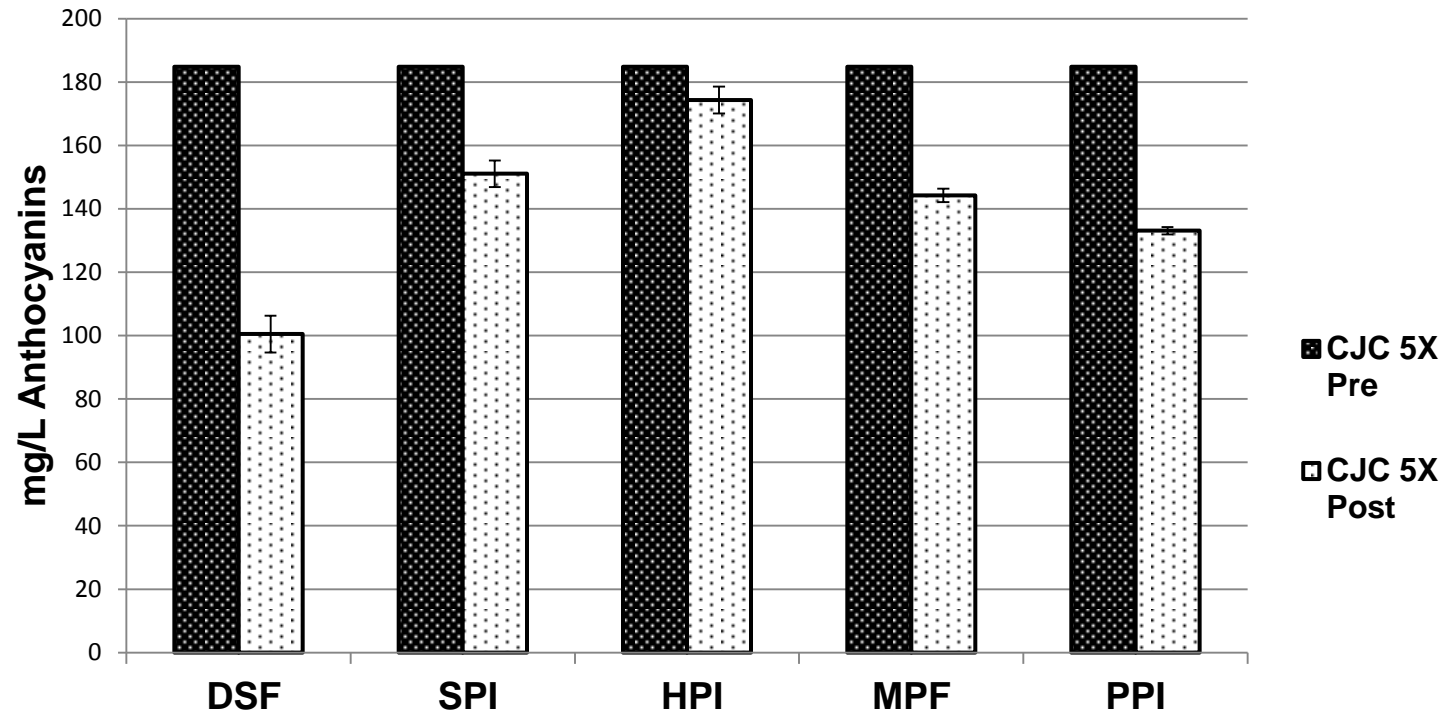

**Supplementary Figure 2:** Concentration of total monomeric anthocyanins pre (before) and post (after) treatment with DSF (defatted soy flour), SPI (soy protein isolate), HPI (hemp protein isolate), MPN (medium roast peanut flour) and PPI (pea protein isolate)., measured by pH differential assay and calculated as cyanidin-3-O-glucoside equivalent.

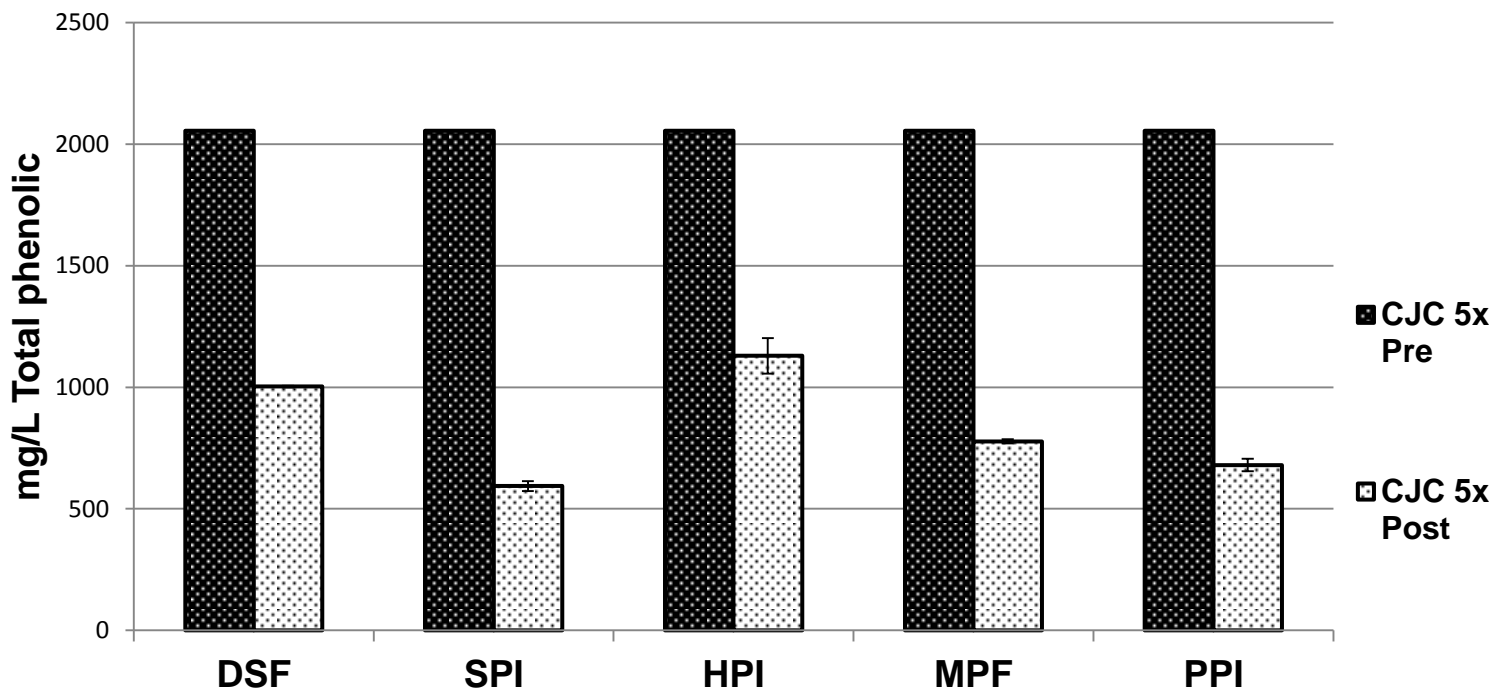

**Supplementary Figure 3:** Concentration of total phenolics pre (before) and post (after) treatment with DSF (defatted soy flour), SPI (soy protein isolate), HPI (hemp protein isolate), MPN (medium roast peanut flour) and PPI (pea protein isolate), measured by Folin Ciocalteu assay and calculated as gallic acid equivalent.
